# Supplementary material
Source: PubMed Central journal article supplement (PMC5726931)
Supplement: NIHMS910494-supplement-1.pdf [file NIHMS910494-supplement-1.pdf]

## SUPPORTING INFORMATION

### Ultrasensitive optical imaging with lanthanide lumiphores

Ukrae Cho<sup>1</sup>, Daniel P. Riordan<sup>2,4</sup>, Paulina Ciepla<sup>1</sup>, Kiranmai S. Kocherlakota<sup>1,5</sup>,  
James K. Chen<sup>1,3,\*</sup>, and Pehr B. Harbury<sup>2,\*</sup>

<sup>1</sup>Department of Chemical and Systems Biology; <sup>2</sup>Department of Biochemistry; <sup>3</sup>Department of Developmental Biology, Stanford University School of Medicine, Stanford, California 94305, USA

<sup>4</sup>Present address: 10X Genomics, Pleasanton, California 94566, USA

<sup>5</sup>Present address: Chan-Zuckerberg Biohub and Department of Bioengineering, Stanford University School of Engineering, Stanford, California 94305, USA

\*Correspondence should be addressed to J.K.C. (jameschen@stanford.edu) or P.B.H. (harbury@stanford.edu)

## TABLE OF CONTENTS

|                               |       |
|-------------------------------|-------|
| Supplementary Table 1 .....   | 3     |
| Supplementary Table 2 .....   | 4 – 5 |
| Supplementary Table 3 .....   | 6     |
| Supplementary Table 4 .....   | 6     |
| Supplementary Figure 1 .....  | 7     |
| Supplementary Figure 2 .....  | 8     |
| Supplementary Figure 3 .....  | 9     |
| Supplementary Figure 4 .....  | 10    |
| Supplementary Figure 5 .....  | 11    |
| Supplementary Figure 6 .....  | 12    |
| Supplementary Figure 7 .....  | 13    |
| Supplementary Figure 8 .....  | 14    |
| Supplementary Figure 9 .....  | 15    |
| Supplementary Figure 10 ..... | 16    |
| Supplementary Figure 11 ..... | 17    |
| Supplementary Figure 12 ..... | 18    |
| Supplementary Figure 13 ..... | 19    |
| Supplementary Figure 14 ..... | 20    |
| Supplementary Figure 15 ..... | 21    |

**Supplementary Table 1. Comparison of LED and Q-switched laser light sources**

| <b>Specification</b>                                           | <b>LED</b><br>(Prizmatix, Mic-LED-365)        | <b>QSL***</b><br>(Spectra-Physics, Explorer One 355-300) |
|----------------------------------------------------------------|-----------------------------------------------|----------------------------------------------------------|
| Pulse width                                                    | Variable, but typically 1 ms                  | < 15 ns (FWHM)                                           |
| Power at output                                                | 250 mW*                                       | Maximum of 300 mW (50 kHz)*                              |
| Beam diameter at output*                                       | 22 mm                                         | 0.170 ± 0.025 mm                                         |
| Beam divergence (full angle)*                                  | 40 mrad                                       | < 3.0 ± 0.5 mrad                                         |
| Distance from the output to the stage                          | 30 cm                                         | 130 cm                                                   |
| Beam diameter at the stage                                     | 4 mm                                          | 4 mm                                                     |
| Power at the objective back aperture<br>(during pulse-on time) | 120 mW**                                      | N/A                                                      |
| Power at the stage (during pulse)                              | 50 mW (6.3x UVI objective)                    | 33 W (1-μJ pulse)                                        |
| Power at the stage (time-averaged)                             | 12 mW (1-ms pulses at 240 Hz)                 | 7.5 mW (1-μJ pulses at 15 kHz)                           |
| Irradiance at stage (time-averaged)                            | 95 mW/cm <sup>2</sup> (1-ms pulses at 240 Hz) | 60 mW/cm <sup>2</sup> (1-μJ pulses at 15 kHz)            |

\* Values provided by the manufacturer.

\*\* The diffuser positioned between the light source and microscope main body was removed to maximize light transmittance.

\*\*\* Light transmission efficiency between QSL and microscope stage was determined to be ~50%.

**Supplementary Table 2. Acquisition configurations for time-resolved luminescence imaging.** A 360/40-nm band-pass excitation filter was used for all time-resolved imaging studies.

| Figure | Light source | QSL pulse energy ( $\mu\text{J}$ ) | Objective | LRET acceptor  | Emission filter (nm) | Cycle period ( $\mu\text{s}$ ) | Excitation ( $\mu\text{s}$ ) | Delay ( $\mu\text{s}$ ) | Collection ( $\mu\text{s}$ ) | Excitation frequency (Hz) | Total pulse number | Total imaging time (sec) |
|--------|--------------|------------------------------------|-----------|----------------|----------------------|--------------------------------|------------------------------|-------------------------|------------------------------|---------------------------|--------------------|--------------------------|
| 2a     | LED          | N.A.                               | 5x        | – Atto 610     | > 575                | 3,333                          | 10                           | Variable                | 500                          | 300                       | 2,000              | 6.7                      |
|        | LED          | N.A.                               | 5x        | + Atto 610     | > 575                | 3,333                          | 10                           | Variable                | 500                          | 300                       | 1,000              | 3.3                      |
| 2c     | LED          | N.A.                               | 5x        | – Atto 610     | > 575                | 2,222                          | 1                            | 1                       | 2,000                        | 450                       | 1,500              | 3.3                      |
|        | LED          | N.A.                               | 5x        | + Atto 610     | > 575                | 56                             | 1                            | 1                       | 50                           | 18,000                    | 60,000             | 3.3                      |
| 2d     | LED          | N.A.                               | 6.3x      | – Atto 610     | > 575                | 6,667                          | Variable                     | 2                       | 2,030                        | 150                       | 250                | 1.7                      |
|        | LED          | N.A.                               | 6.3x      | + Atto 610     | > 575                | 6,667                          | Variable                     | 2                       | 74                           | 150                       | 250                | 1.7                      |
| 3a     | LED          | N.A.                               | 5x/6.3x   | N.A.           | > 575/615/25         | 3,333                          | 250                          | Variable                | 2,000                        | 300                       | 1,000              | 3.3                      |
| 4b     | LED          | N.A.                               | Variable  | N.A.           | > 575                | 2,222                          | 25                           | 10                      | 2,000                        | 450                       | 375                | 0.83                     |
|        | QSL          | 1.6                                | Variable  | N.A.           | > 575                | 2,222                          | 1                            | 10                      | 2,000                        | 450                       | 375                | 0.83                     |
| 4c     | QSL          | 14.6                               | 10x       | N.A.           | > 575                | 2,222                          | 1                            | 1                       | 2,000                        | 450                       | 750                | 1.7                      |
| 5a     | LED          | N.A.                               | 6.3x      | N.A.           | > 575                | 6,667                          | Variable                     | 10                      | 2,000                        | 150                       | 25                 | 0.17                     |
|        | QSL          | Variable                           | 6.3x      | N.A.           | > 575                | 6,667                          | 1                            | 10                      | 2,000                        | 150                       | 25                 | 0.17                     |
| 6a     | QSL          | 15.0                               | 10x       | – Atto 610     | > 575                | 3,333                          | 1                            | 1                       | 2,853                        | 300                       | 1,000              | 3.3                      |
|        | QSL          | 1.0                                | 10x       | + Atto 610     | > 575/655/40         | 67                             | 1                            | 1                       | 63                           | 15,000                    | 50,000             | 3.3                      |
| 6b     | QSL          | 0.5                                | 6.3x      | +/- Atto Rho14 | > 575/655/40         | 67                             | 1                            | 1                       | 60                           | 15,000                    | 50,000             | 3.3                      |
| S3     | LED          | N.A.                               | 5x        | N.A.           | > 575                | 1,333                          | 200                          | 300                     | 800                          | 750                       | 5,000              | 6.7                      |
| S9c    | LED          | N.A.                               | 6.3x      | – Atto 610     | > 575                | 4,167                          | 1,000                        | 1                       | 2,853                        | 240                       | 8                  | 0.033                    |

|      |     |      |      |            |       |       |     |          |          |        |     |       |
|------|-----|------|------|------------|-------|-------|-----|----------|----------|--------|-----|-------|
|      | QSL | 20.0 | 6.3x | + Atto 610 | > 575 | 46    | 1   | 1        | 42       | 21,750 | 725 | 0.033 |
| S10a | QSL | 1.3  | 10x  | + Atto 610 | > 575 | 3,333 | 1   | Variable | 2,000    | 300    | 100 | 0.3   |
| S11  | LED | N.A. | 6.3x | N.A.       | > 575 | 4,167 | 100 | 1        | Variable | 240    | 400 | 1.7   |

**Supplementary Table 3. Acquisition configurations for homogeneous solution assays.**

| Figure | Eu <sup>3+</sup> complex                                                | Interacting molecules              | Excitation (nm) | Emission (nm) | Delay (μs) | Collection (μs) | Excitation frequency (Hz) | Total pulse number |
|--------|-------------------------------------------------------------------------|------------------------------------|-----------------|---------------|------------|-----------------|---------------------------|--------------------|
| S2b    | Eu <sup>3+</sup> /ATBTA<br>Eu <sup>3+</sup> /DTPA-cs124-CF <sub>3</sub> | dNTP                               | 330-350         | 614           | 20         | 100             | 100                       | 10                 |
| S2c    | Eu <sup>3+</sup> /ATBTA<br>Eu <sup>3+</sup> /DTPA-cs124-CF <sub>3</sub> | Ascorbate                          | 330-350         | 604-640       | 50         | 450             | 100                       | 20                 |
| 1c     | Eu <sup>3+</sup> /ATBTA                                                 | Sulfo-Cy3<br>Sulfo-Cy5<br>Atto 610 | 330-350         | 550-750       | Variable   | 100             | 100                       | 10                 |
| 1d     | Eu <sup>3+</sup> /ATBTA                                                 | Atto 610                           | 330-350         | 550-750       | 30         | 1,000           | 100                       | 20                 |

**Supplementary Table 4. Secondary antibodies for whole-mount immunostaining of zebrafish embryos**

| Figure | Antibody                     | Label                   | Source                   | Product Number | Concentration |
|--------|------------------------------|-------------------------|--------------------------|----------------|---------------|
| 4c     | Goat anti-mouse<br>IgG (H+L) | Alexa Fluor 405         | Thermo Fisher Scientific | A-31553        | 1 μg/mL       |
|        |                              | Alexa Fluor 488         |                          | A-11001        |               |
|        |                              | Alexa Fluor 594         |                          | A-11032        |               |
|        |                              | Eu <sup>3+</sup> /DTBTA | Jackson ImmunoResearch   | 115-005-146    |               |
| 6a     | Goat anti-mouse<br>IgG (H+L) | Alexa Fluor 594         | Thermo Fisher Scientific | 31160          | Variable      |
|        |                              | Eu <sup>3+</sup> /DTBTA |                          |                |               |

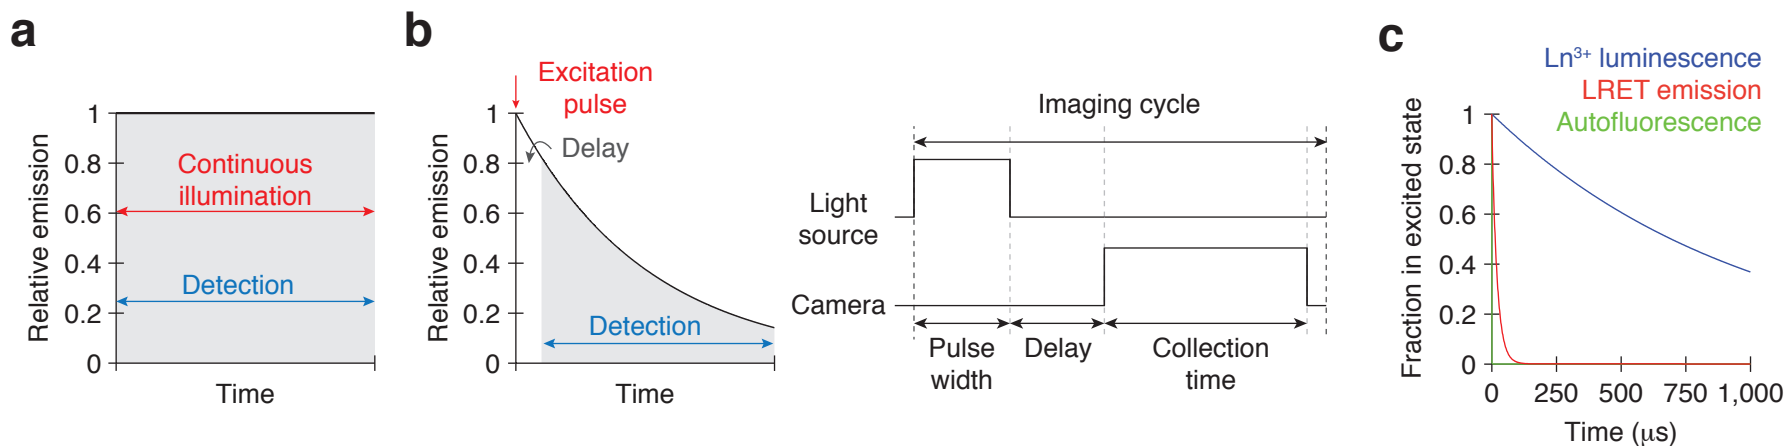

**Supplementary Figure 1. Time-resolved lanthanide detection.** Excitation and detection regimens for (a) steady-state fluorescence and (b) time-resolved luminescence microscopy. (c) Theoretical decay curves of  $\text{Eu}^{3+}$  (blue;  $\tau = 1,000 \mu\text{s}$ ), LRET (red;  $\tau = 20 \mu\text{s}$ ), and fluorescence (green;  $\tau = 0.01 \mu\text{s}$ ) emissions.

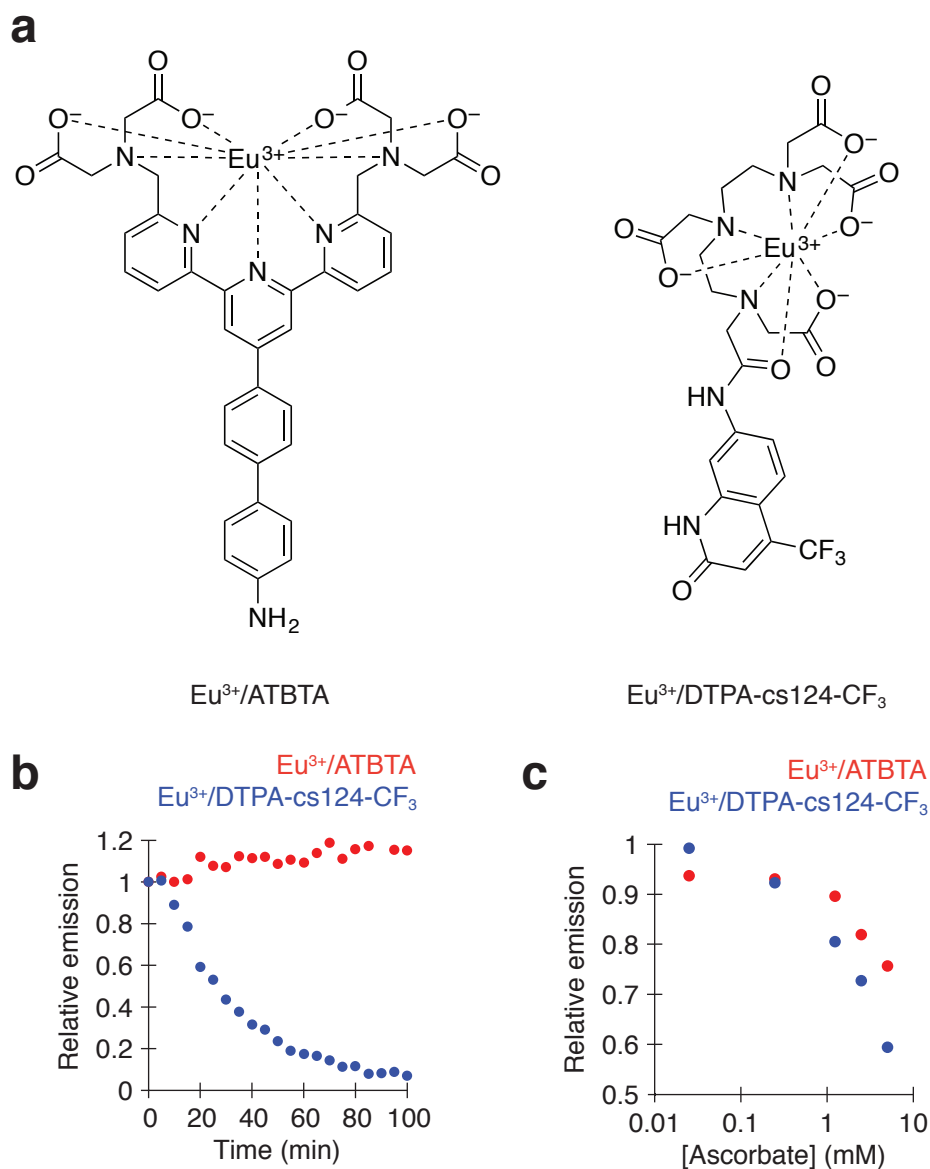

**Supplementary Figure 2. Chemical properties of selected  $\text{Eu}^{3+}$  complexes.** (a) Chemical structures of  $\text{Eu}^{3+}/\text{ATBTA}$  and  $\text{Eu}^{3+}/\text{DTPA-cs124-CF}_3$ . (b) Differential resistance of  $\text{Eu}^{3+}/\text{ATBTA}$  and  $\text{Eu}^{3+}/\text{DTPA-cs124-CF}_3$  to 2 mM dNTPs. Each lanthanide complex was tested at a 0.5- $\mu\text{M}$  concentration. (c) Concentration-dependent quenching of  $\text{Eu}^{3+}/\text{ATBTA}$  and  $\text{Eu}^{3+}/\text{DTPA-cs124-CF}_3$  luminescence by ascorbate (0.5- $\mu\text{M}$  solutions for each  $\text{Eu}^{3+}$  complex).



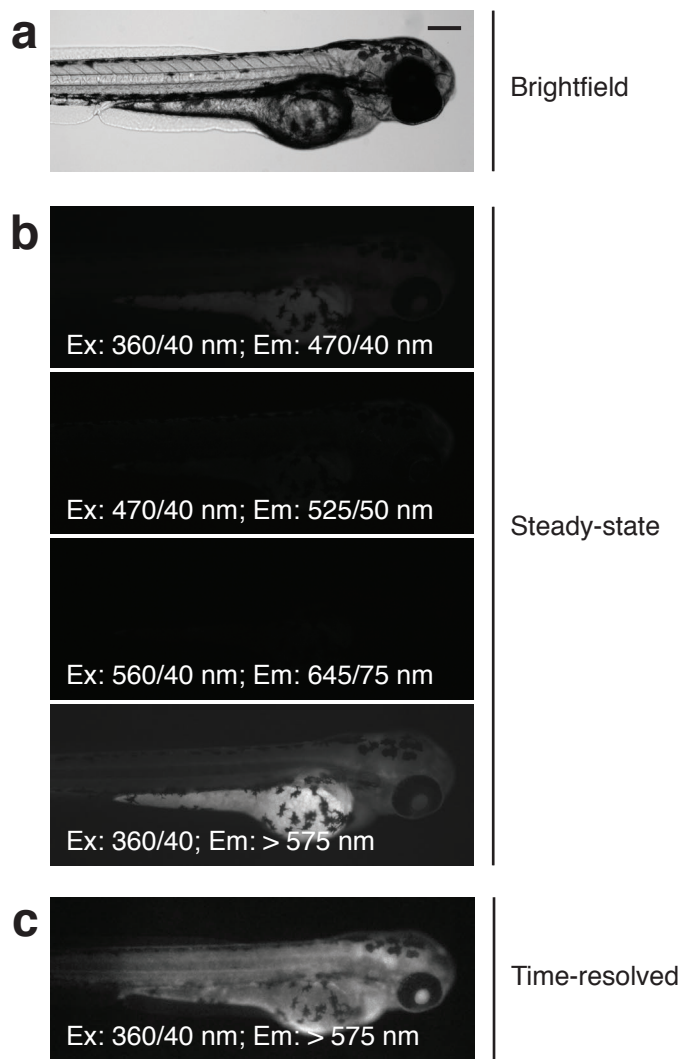

**Supplementary Figure 3. Steady-state and time-resolved luminescence imaging of lanthanide complexes in zebrafish embryos.** Zebrafish zygotes were injected with a  $\text{Eu}^{3+}$ /ATBTA-labeled MO (60 fmol/embryo) and then imaged at 3-dpf by brightfield (a), steady-state luminescence (b), or time-resolved luminescence (c) microscopy. All steady-state fluorescence micrographs were acquired using the designated filtersets and a 250-ms acquisition time. Time-resolved microscopy was conducted with the indicated filterset and imaging cycles composed of a 200- $\mu\text{s}$  excitation pulse, 300- $\mu\text{s}$  delay, and 800- $\mu\text{s}$  emission acquisition period. Scale bar: 200  $\mu\text{m}$ .

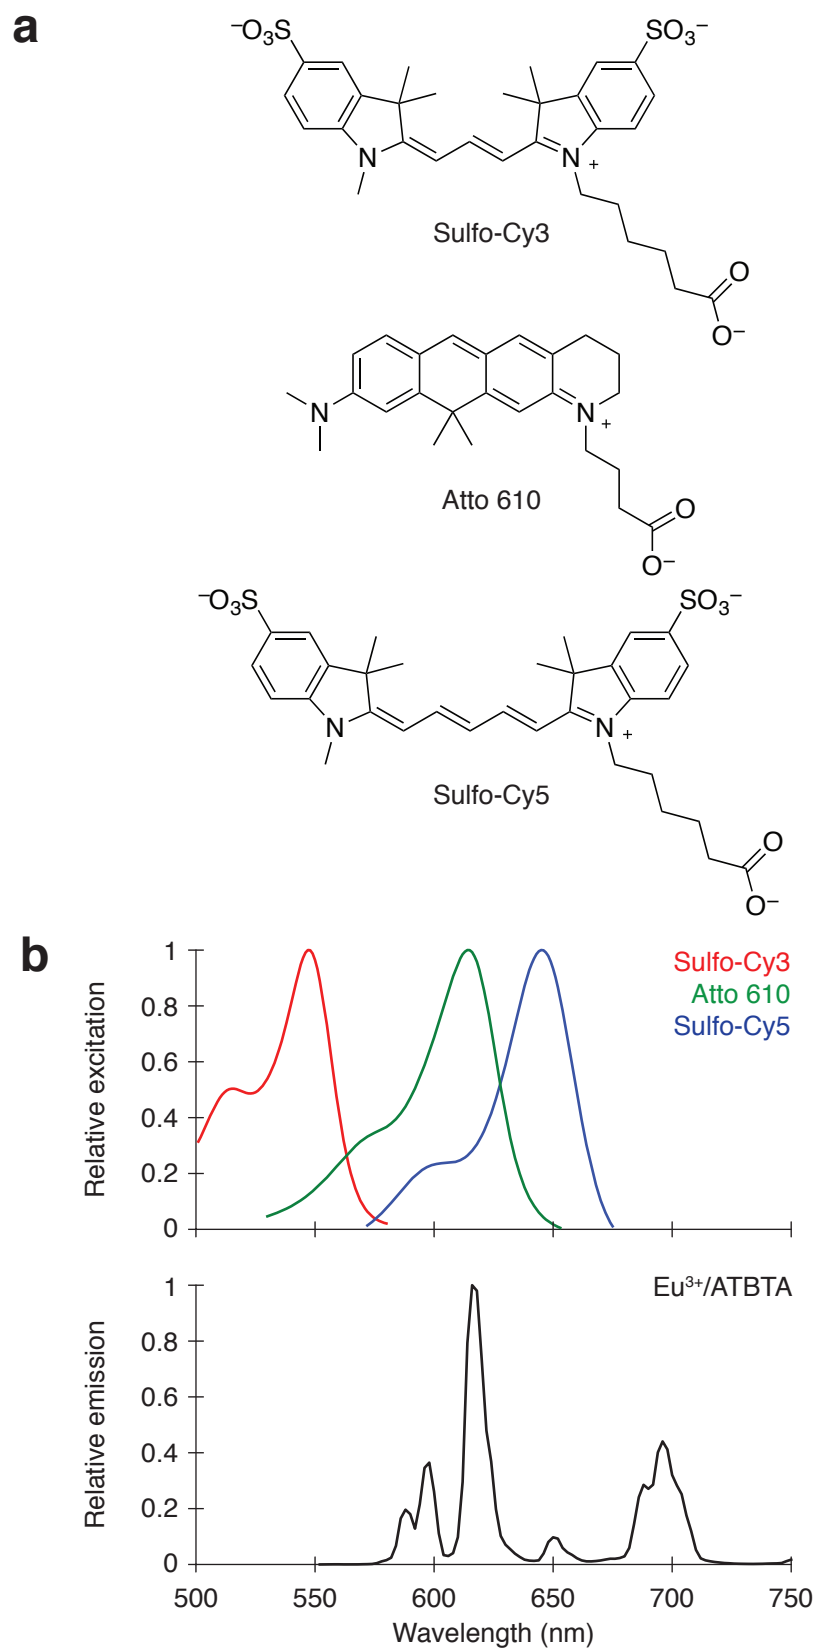

**Supplementary Figure 4. Comparison of excitation spectra of LRET acceptors and the Eu<sup>3+</sup>/ATBTA emission spectrum.** (a) Chemical structures of Sulfo-Cy3, Atto 610, and Sulfo-Cy5. (b) The LRET acceptors reduce Eu<sup>3+</sup>/ATBTA luminescence lifetime with efficiencies that correlate with the overlap between their excitation spectra and the Eu<sup>3+</sup>/ATBTA emission spectrum.

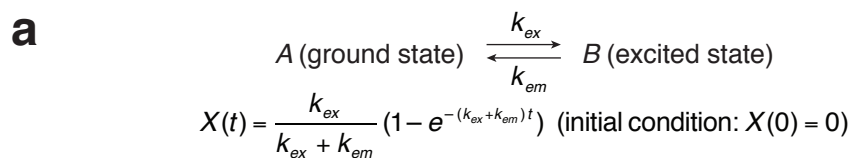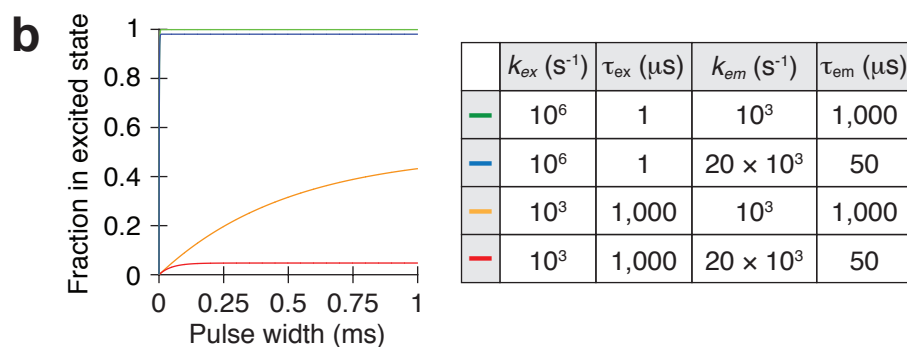

**Supplementary Figure 5. Kinetic analysis of lanthanide excitation.** (a) Exponential equation describing the relationship between lanthanide excited-state fraction ( $X(t)$ ), excitation and emission rates ( $k_{ex}$  and  $k_{em}$ ), and illumination pulse duration ( $t$ ). (b) Theoretical lanthanide excitation curves for different combinations of excitation and emission rates.

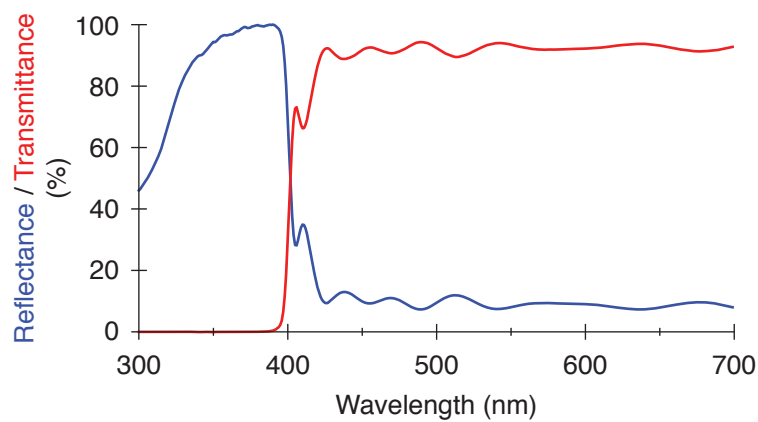

**Supplementary Figure 6. Reflectance and transmittance curves of the TiO<sub>2</sub>-coated coverglass.** The UV-rejecting coverglass used for QSL trans-illumination includes a TiO<sub>2</sub> coating and an overlying SiO<sub>2</sub> layer for chemical stability. The majority of 355-nm QSL light is reflected by the TiO<sub>2</sub> coating, and the rest is absorbed. A 0° angle of incidence was used to measure the reflectance and transmittance curves, and the TiO<sub>2</sub>/SiO<sub>2</sub> layer thickness is negligible compared to that of the coverglass (0.2-mm thick fused silica).

**a**

|     | Energy ( $\mu\text{J}$ ) | $k_{ex}$ ( $\text{s}^{-1}$ ) | $\tau_{ex}$ (ns)   | $k_{em}$ ( $\text{s}^{-1}$ )   | $\tau_{em}$ ( $\mu\text{s}$ ) |
|-----|--------------------------|------------------------------|--------------------|--------------------------------|-------------------------------|
| QSL | 25.7                     | $29.3 \times 10^6$           | 34.2               | $1.05 \times 10^3$<br>(- LRET) | 951<br>(- LRET)               |
|     | 20.2                     | $24.3 \times 10^6$           | 41.2               |                                |                               |
|     | 15.6                     | $19.8 \times 10^6$           | 50.6               |                                |                               |
|     | 10.3                     | $14.3 \times 10^6$           | 70.1               | or                             | or                            |
|     | 5.4                      | $6.42 \times 10^6$           | 156                | $27.8 \times 10^3$<br>(+ LRET) | 36.0<br>(+ LRET)              |
|     | 2.3                      | $2.02 \times 10^6$           | 494                |                                |                               |
| LED |                          | 357                          | $2.80 \times 10^6$ |                                |                               |

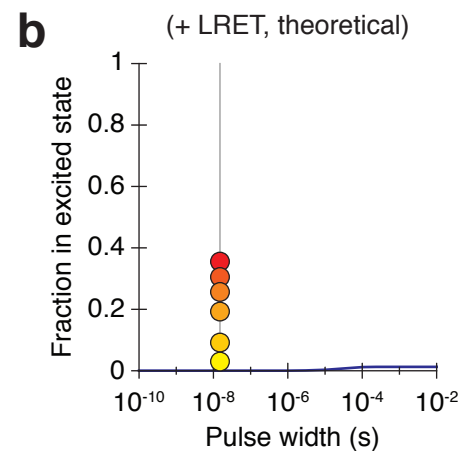

**Supplementary Figure 7. QSL enables efficient excitation of lanthanide probes both in the presence and absence of LRET.** (a) QSL  $k_{ex}$  values calculated using the data acquired in Fig. 5a and the equation described in Supplementary Fig. 5. (b) Predicted LED- or QSL-induced excited-state levels in the presence of LRET ( $\tau_{em} = 36.0 \mu\text{s}$ ).

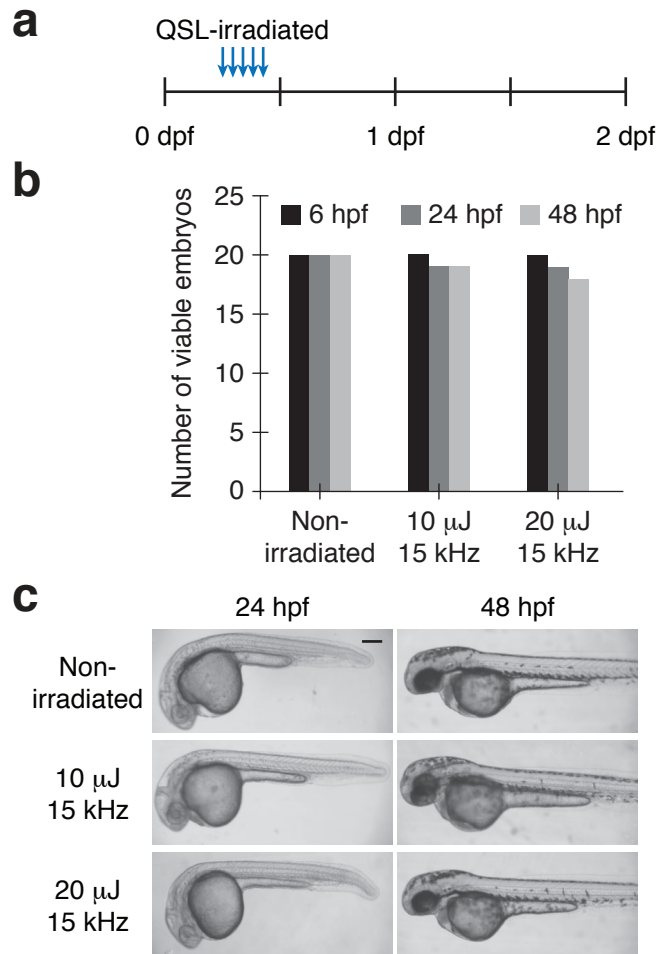

**Supplementary Figure 8. QSL irradiation has minimal effects on zebrafish development.** Zebrafish zygotes were irradiated with QSL every hour between the shield and bud stages (6-10 hpf; 5 irradiations in total) and subsequently analyzed at 24 and 48 hpf for evidence of developmental defects or toxicity. 10- or 20- $\mu$ J QSL pulses were given at 15 kHz over a 3.3-s period for each irradiation. 1- $\mu$ J QSL pulses with similar frequencies and total durations are typically employed for trLRET imaging. Scale bar: 200  $\mu$ m.

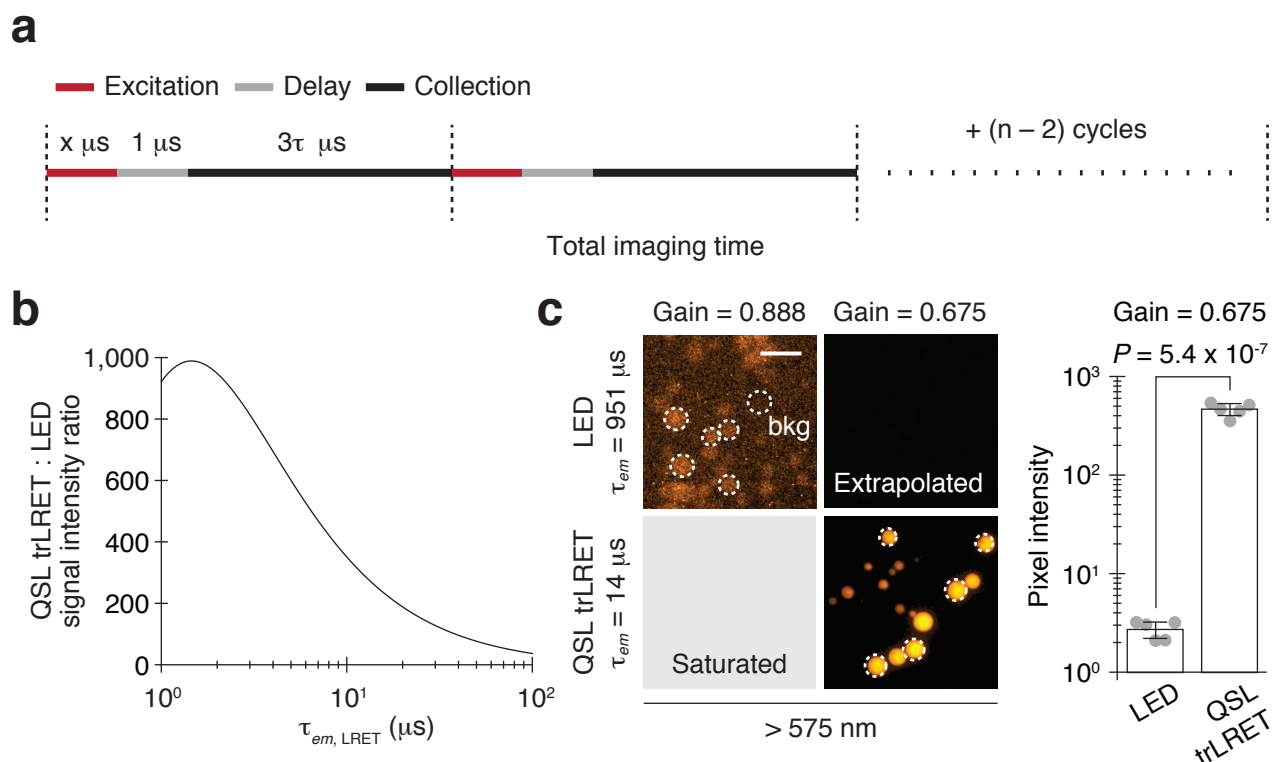

**Supplementary Figure 9. Quantitative comparison of LED- and QSL trLRET-based time-resolved imaging.** (a) Excitation, delay, and collection parameters used to compare LED epi-illumination and QSL trans-reflected illumination with LRET enhancement (see Supplementary Fig. 10 for further details). (b) Predicted QSL trLRET:LED signal intensity ratios for differing LRET-enhanced luminescence lifetimes ( $\tau_{em, LRET}$ ) when LRET efficiencies are high (> 90%). (c)  $\text{Eu}^{3+}$ /ATBTA-functionalized beads imaged by time-resolved microscopy using the designated camera gain settings (0.675 or 0.888) and either LED epi-illumination or QSL trLRET. Total imaging times were identical for all conditions, and average signal intensities  $\pm$  s.d. of selected beads ( $n = 5$ , dashed circles) are shown, adjusted for gain-dependent camera sensitivity as described in Supplementary Fig. 11. Scale bar: 200  $\mu\text{m}$ .

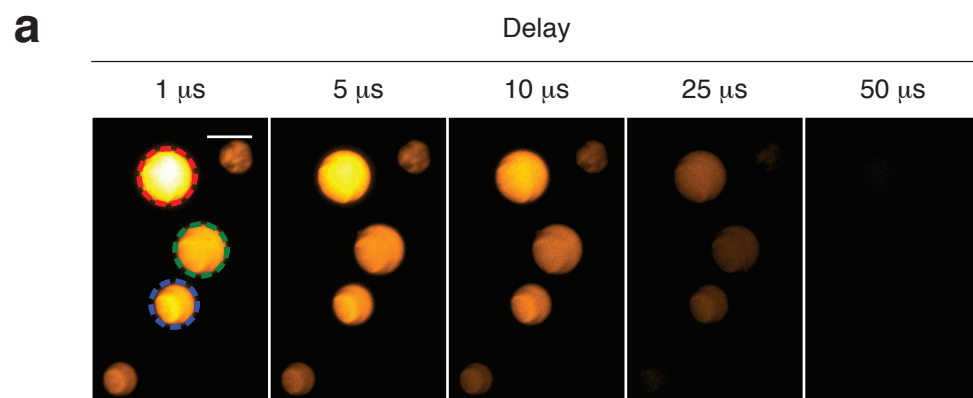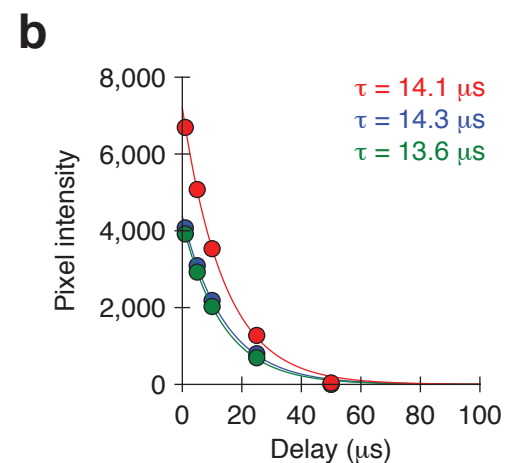

**c**

|                                           | LED                                                                      | QSL trLRET                                           |
|-------------------------------------------|--------------------------------------------------------------------------|------------------------------------------------------|
| Excitation                                | 1,000 $\mu\text{s}$                                                      | 1 $\mu\text{s}$                                      |
| Delay                                     | 1 $\mu\text{s}$                                                          | 1 $\mu\text{s}$                                      |
| Collection ( $3\tau$ )                    | $3 \times 951 \mu\text{s}$                                               | $3 \times \tau_{em, \text{LRET}} \mu\text{s}$        |
| Cycle period                              | 4,167 $\mu\text{s}$                                                      | $2 + 3\tau_{em, \text{LRET}} \mu\text{s}$            |
| 1 Cycle rate                              | 240 Hz                                                                   | $10^6 / (2 + 3\tau_{em, \text{LRET}}) \text{Hz}$     |
| 2 Quantum yield                           | 0.38 ( $\text{QY}_{\text{Eu}}$ )                                         | $E_{\text{LRET}} \times \text{QY}_{\text{Atto 610}}$ |
| 3 Fraction of probes excited              | 0.19 ( $\text{LED}_{1 \text{ms}}$ )                                      | 0.31 ( $\text{QSL}_{20.2 \mu\text{J}}$ )             |
| 4 Fraction decayed in $3\tau \mu\text{s}$ | $\frac{\int_1^{1+3\tau} e^{-t/\tau} dt}{\int_0^{\infty} e^{-t/\tau} dt}$ |                                                      |
| Relative signal intensity                 | $1 \times 2 \times 3 \times 4$                                           |                                                      |

**Supplementary Figure 10. Quantitative modeling of LED- and QSL trLRET-based lanthanide imaging.** (a) Time-resolved microscopy of  $\text{Eu}^{3+}/\text{ATBTA}$ -functionalized beads immersed in an aqueous solution of 30  $\mu\text{M}$  Atto 610. The beads were pulse-illuminated with a QSL light source and then imaged after the designated delays. (b) Luminescence decay profiles of beads color-coded in (a). The data were fit to a first-order decay model to obtain the indicated average luminescence lifetimes, with  $R^2$  values of 0.9989 (red), 0.9984 (blue), and 0.9989 (green). (c) Parameters used to estimate integrated  $\text{Eu}^{3+}/\text{ATBTA}$  signal intensities for LED epi-illumination versus QSL trLRET illumination. Scale bar: 100  $\mu\text{m}$ .



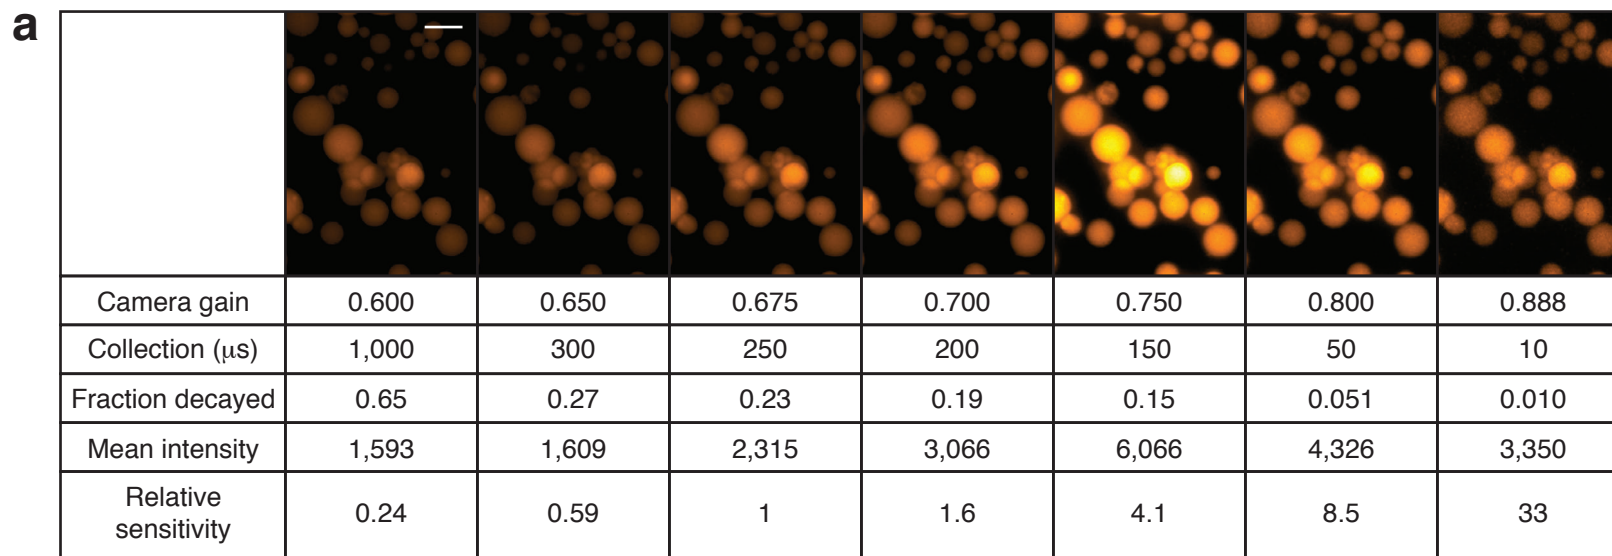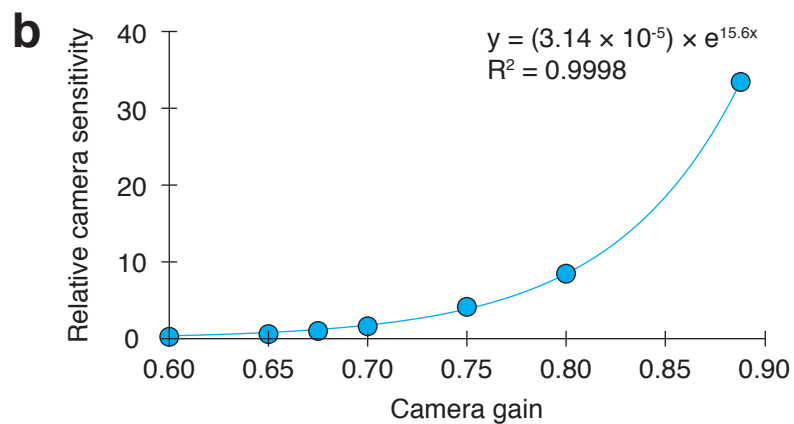

**Supplementary Figure 11. Relative camera sensitivity at different gain values.** (a) Time-resolved imaging of  $\text{Eu}^{3+}$ /ATBTA-functionalized beads using different camera gains and varying emission acquisition times to obtain pixel intensities within the linear dynamic range of the micrograph. All imaging protocols utilized a fixed delay of 1  $\mu\text{s}$ . The mean pixel intensity for each image was then normalized with respect to the lanthanide excited-state decay during emission acquisition (fraction decayed) to obtain relative differences in camera sensitivity. Scale bar: 100  $\mu\text{m}$ . (b) Graphical representation of the relationship between camera gain and sensitivity. The data points were fitted to an exponential curve.

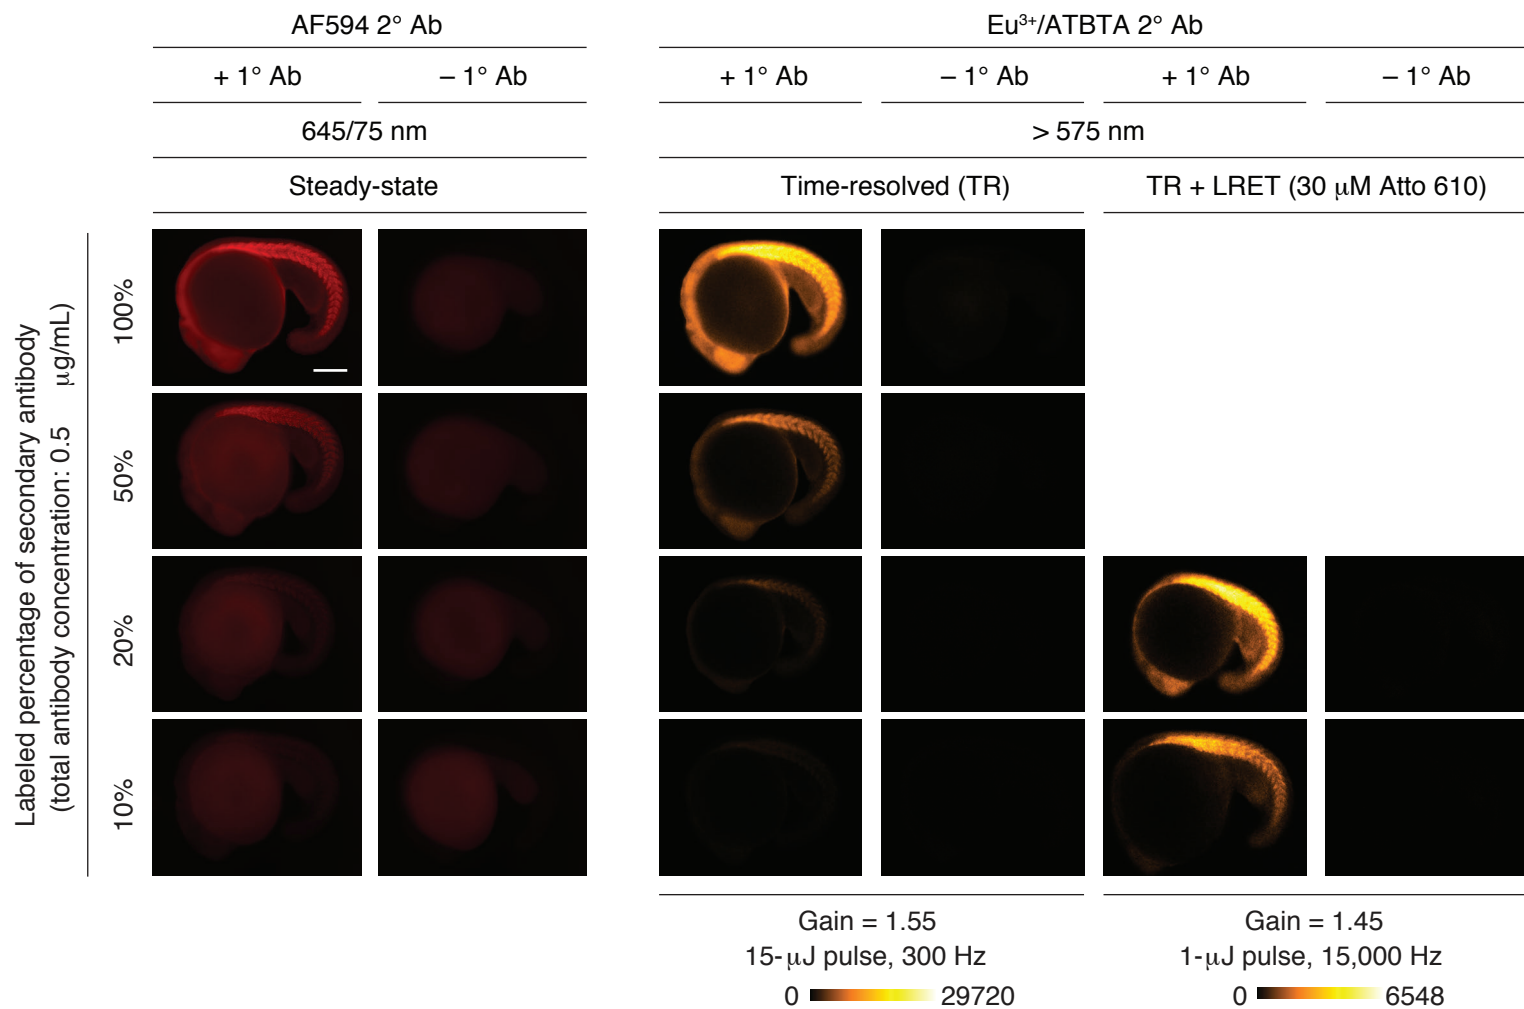

**Supplementary Figure 12. Assessment of background signals in whole-mount lanthanide imaging.** To determine the origin of non-somatic signals in zebrafish embryos stained with an anti-MYH1E antibody and labeled secondary antibodies (Fig. 6a), we stained the fixed embryos with either AF594- or Eu<sup>3+</sup>/ATBTA-conjugated secondary antibody in the presence or absence of the anti MYH1E antibody. Yolk autofluorescence was detected by steady-state fluorescence imaging but suppressed by time-resolved luminescence imaging. Background signals from non-somatic animal cells were predominantly due to non-specific binding of the anti-MYH1E antibody and detected by both imaging modalities. Signals due to animal cell autofluorescence or non-specific binding of the labeled secondary antibodies were too low to reliably quantify in these experiments. Antibody concentrations, incubation times, and imaging configurations were identical to those used for the studies shown in Fig. 6a. Scale bar: 200  $\mu\text{m}$ .

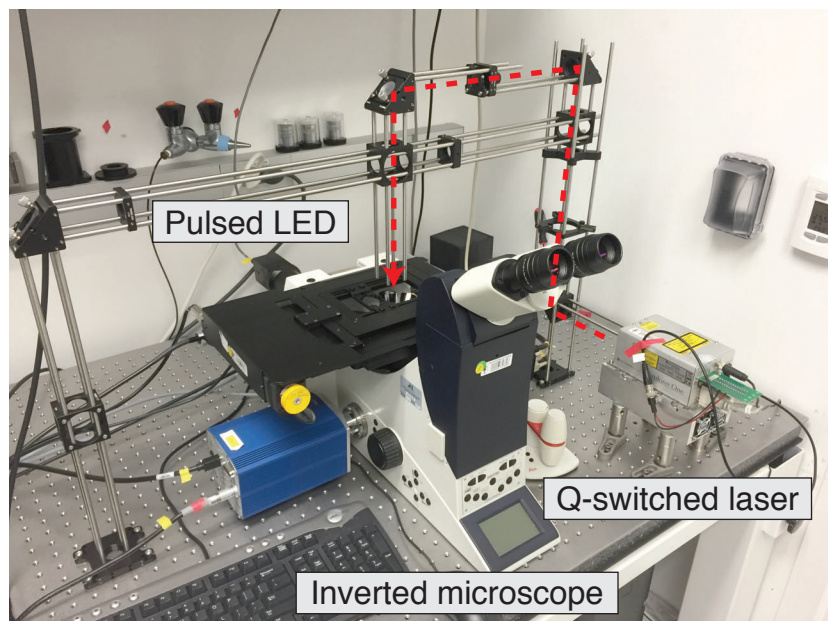

**Supplementary Figure 13. QSL trLRET imaging instrumentation.** A QSL light path was built around a Leica DMI6000B inverted microscope using the indicated optomechanical components for 30-mm and 60-mm cage systems, and the laser was fixed onto an optical table using pillar posts and clamping forks. All Components were obtained from Thorlabs. Steady-state fluorescence and time-resolved imaging cameras were installed at the left and right detector ports, respectively (right port hidden by the microscope body in the photo). A pulsed LED was connected to the built-in module for epi-illumination light sources. The camera and light sources were synchronized by a pulse generator (not shown), and the integrated system was controlled with Piper software (version 2.6.84).

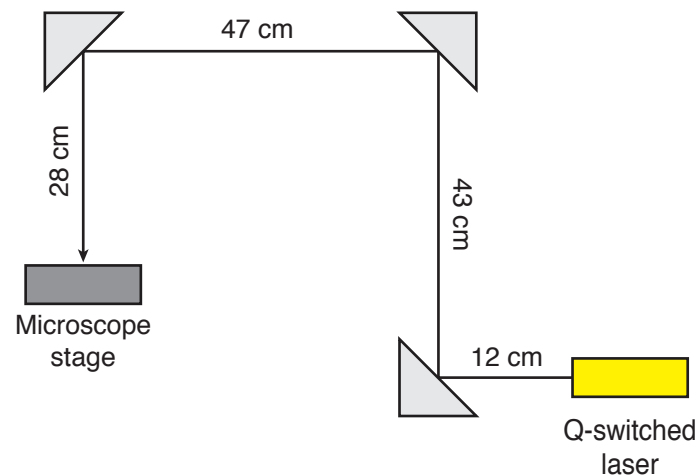

Cage system components for QSL light path

- Ø6 mm cage rod (1"-, 2"-, and 12"- long; ER1, ER2, and ER12)
- 30 mm cage cube (C6W)
- 30 mm cage plate (CP06)
- 30 mm-to-60 mm cage plate adapter (LCP02)
- 60 mm cage plate (LH160C)
- Vertical mounting plate (CPVM)

Mirrors

- Ø1" UV-enhanced mirror (PF10-03-F01)
- Mirror mount (KCB1C)

QSL installation

- Ø1" pillar post (0.75"- and 2"-long; RS2P and RS075)
- Clamping fork (CF125C)

## STANDARD 1H OBSERVE

expl std1h

| SAMPLE      |             | DEC. & VT  |          |
|-------------|-------------|------------|----------|
| date        | Oct 28 2015 | dfrq       | 400.115  |
| solvent     | CD3OD       | dn         | H1       |
| file        | exp         | dpwr       | 30       |
| ACQUISITION |             | dof        |          |
| sfrq        | 400.115     | dm         | nnn      |
| tn          | H1          | dmm        | c        |
| at          | 4.002       | dmf        | 200      |
| np          | 40000       | PROCESSING |          |
| sw          | 4997.5      | wfile      |          |
| fb          | not used    | proc       | ft       |
| bs          | 4           | fn         | not used |
| tpwr        | 61          |            |          |
| pw          | 7.0         | werr       |          |
| d1          | 0.500       | wexp       |          |
| tof         | 0           | wbs        |          |
| nt          | 128         | wnt        |          |
| ct          | 128         |            |          |
| alock       | n           |            |          |
| gain        | not used    |            |          |
| FLAGS       |             |            |          |
| il          | n           |            |          |
| in          | n           |            |          |
| dp          | Y           |            |          |
| DISPLAY     |             |            |          |
| sp          | -476.9      |            |          |
| wp          | 4997.3      |            |          |
| vs          | 129         |            |          |
| sc          | 0           |            |          |
| wc          | 250         |            |          |
| hzmm        | 19.99       |            |          |
| is          | 500.00      |            |          |
| rfl         | 1801.5      |            |          |
| rfp         | 1324.4      |            |          |
| th          | 20          |            |          |
| ins         | 1.000       |            |          |

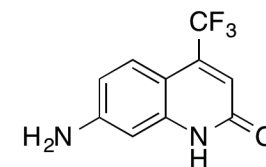cs124-CF<sub>3</sub> (400 MHz, CD<sub>3</sub>OD)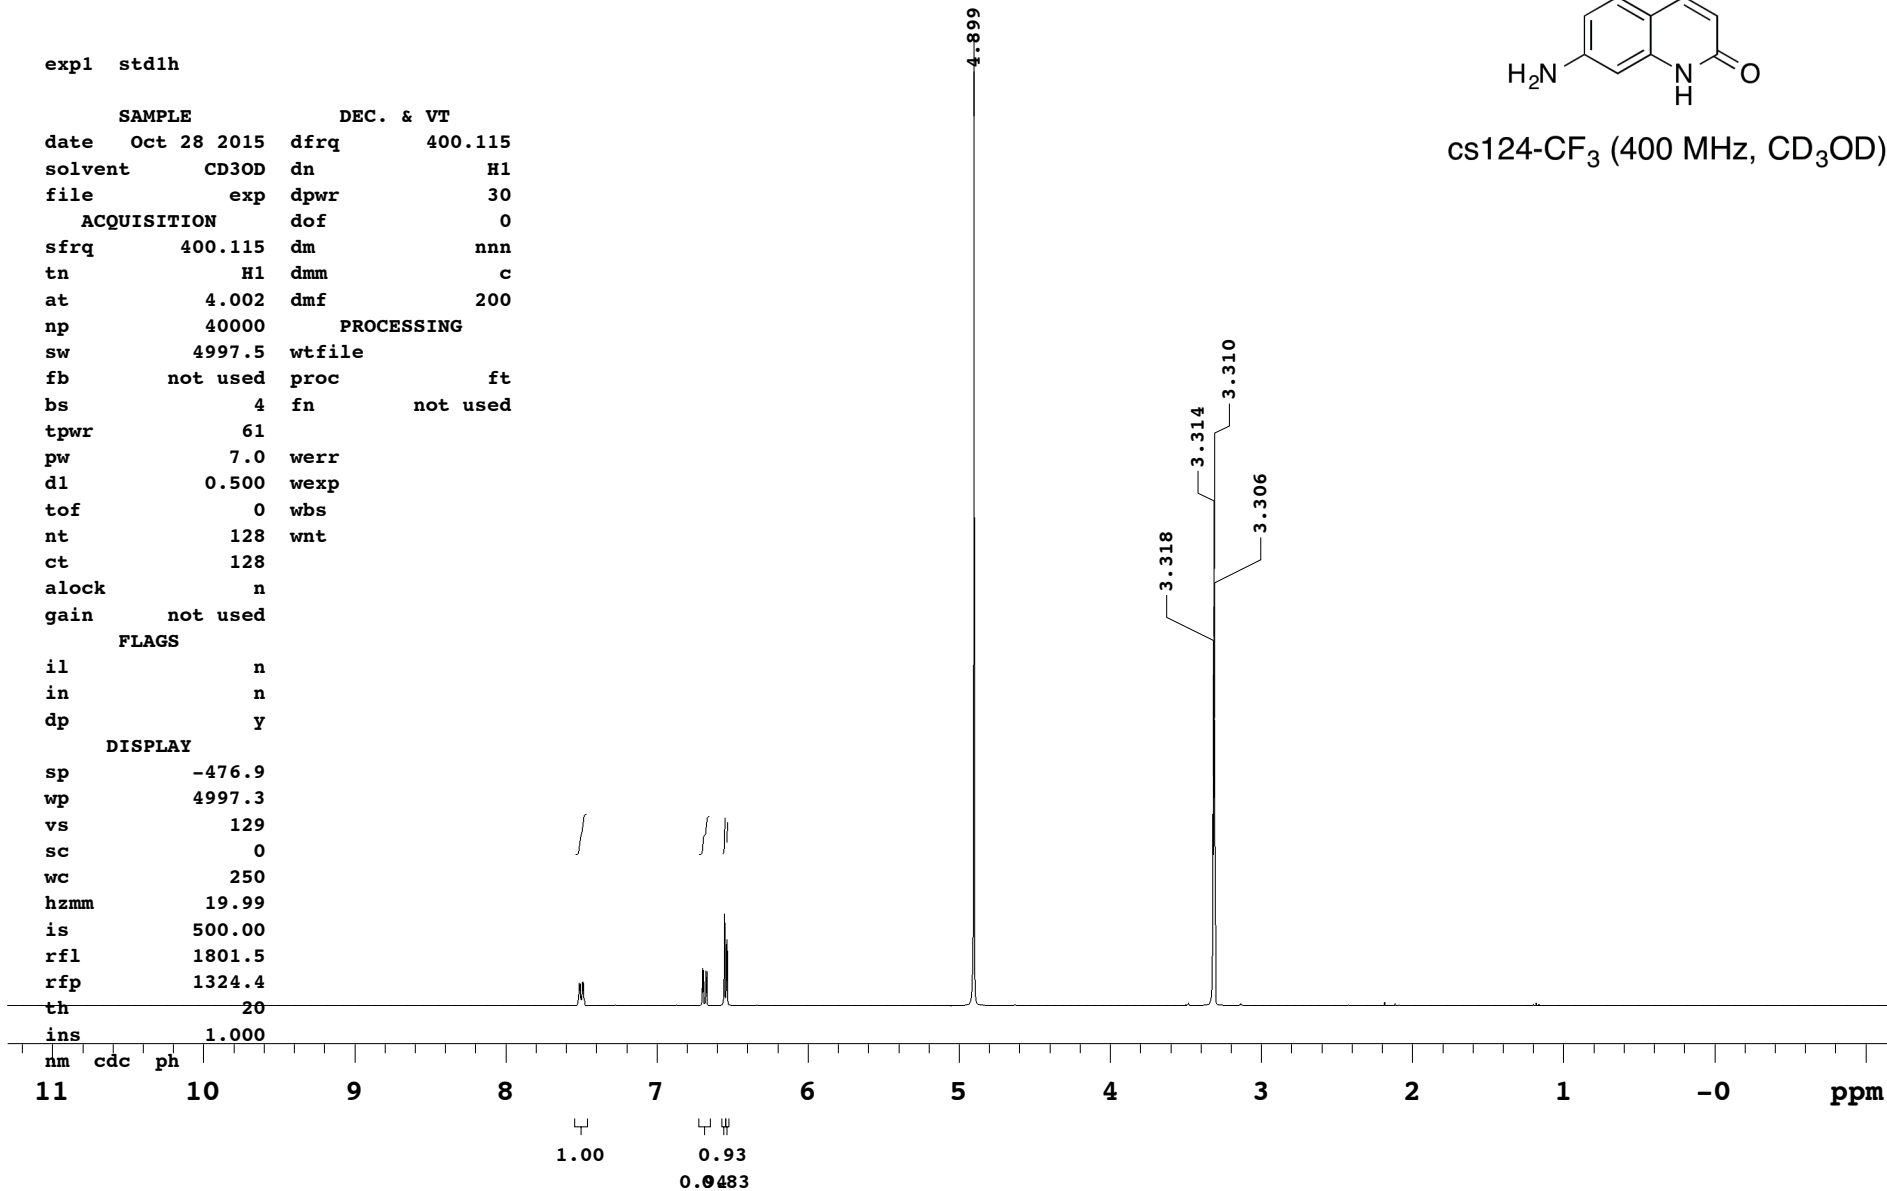Supplementary Figure 14. <sup>1</sup>H NMR spectrum of cs124-CF<sub>3</sub>.

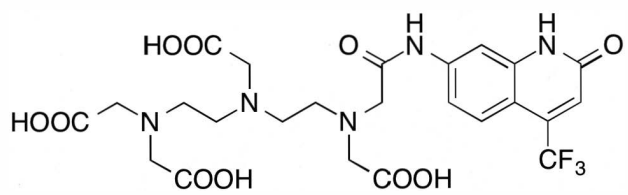

DTPA-cs124-CF<sub>3</sub> (400 MHz, CD<sub>3</sub>OD)

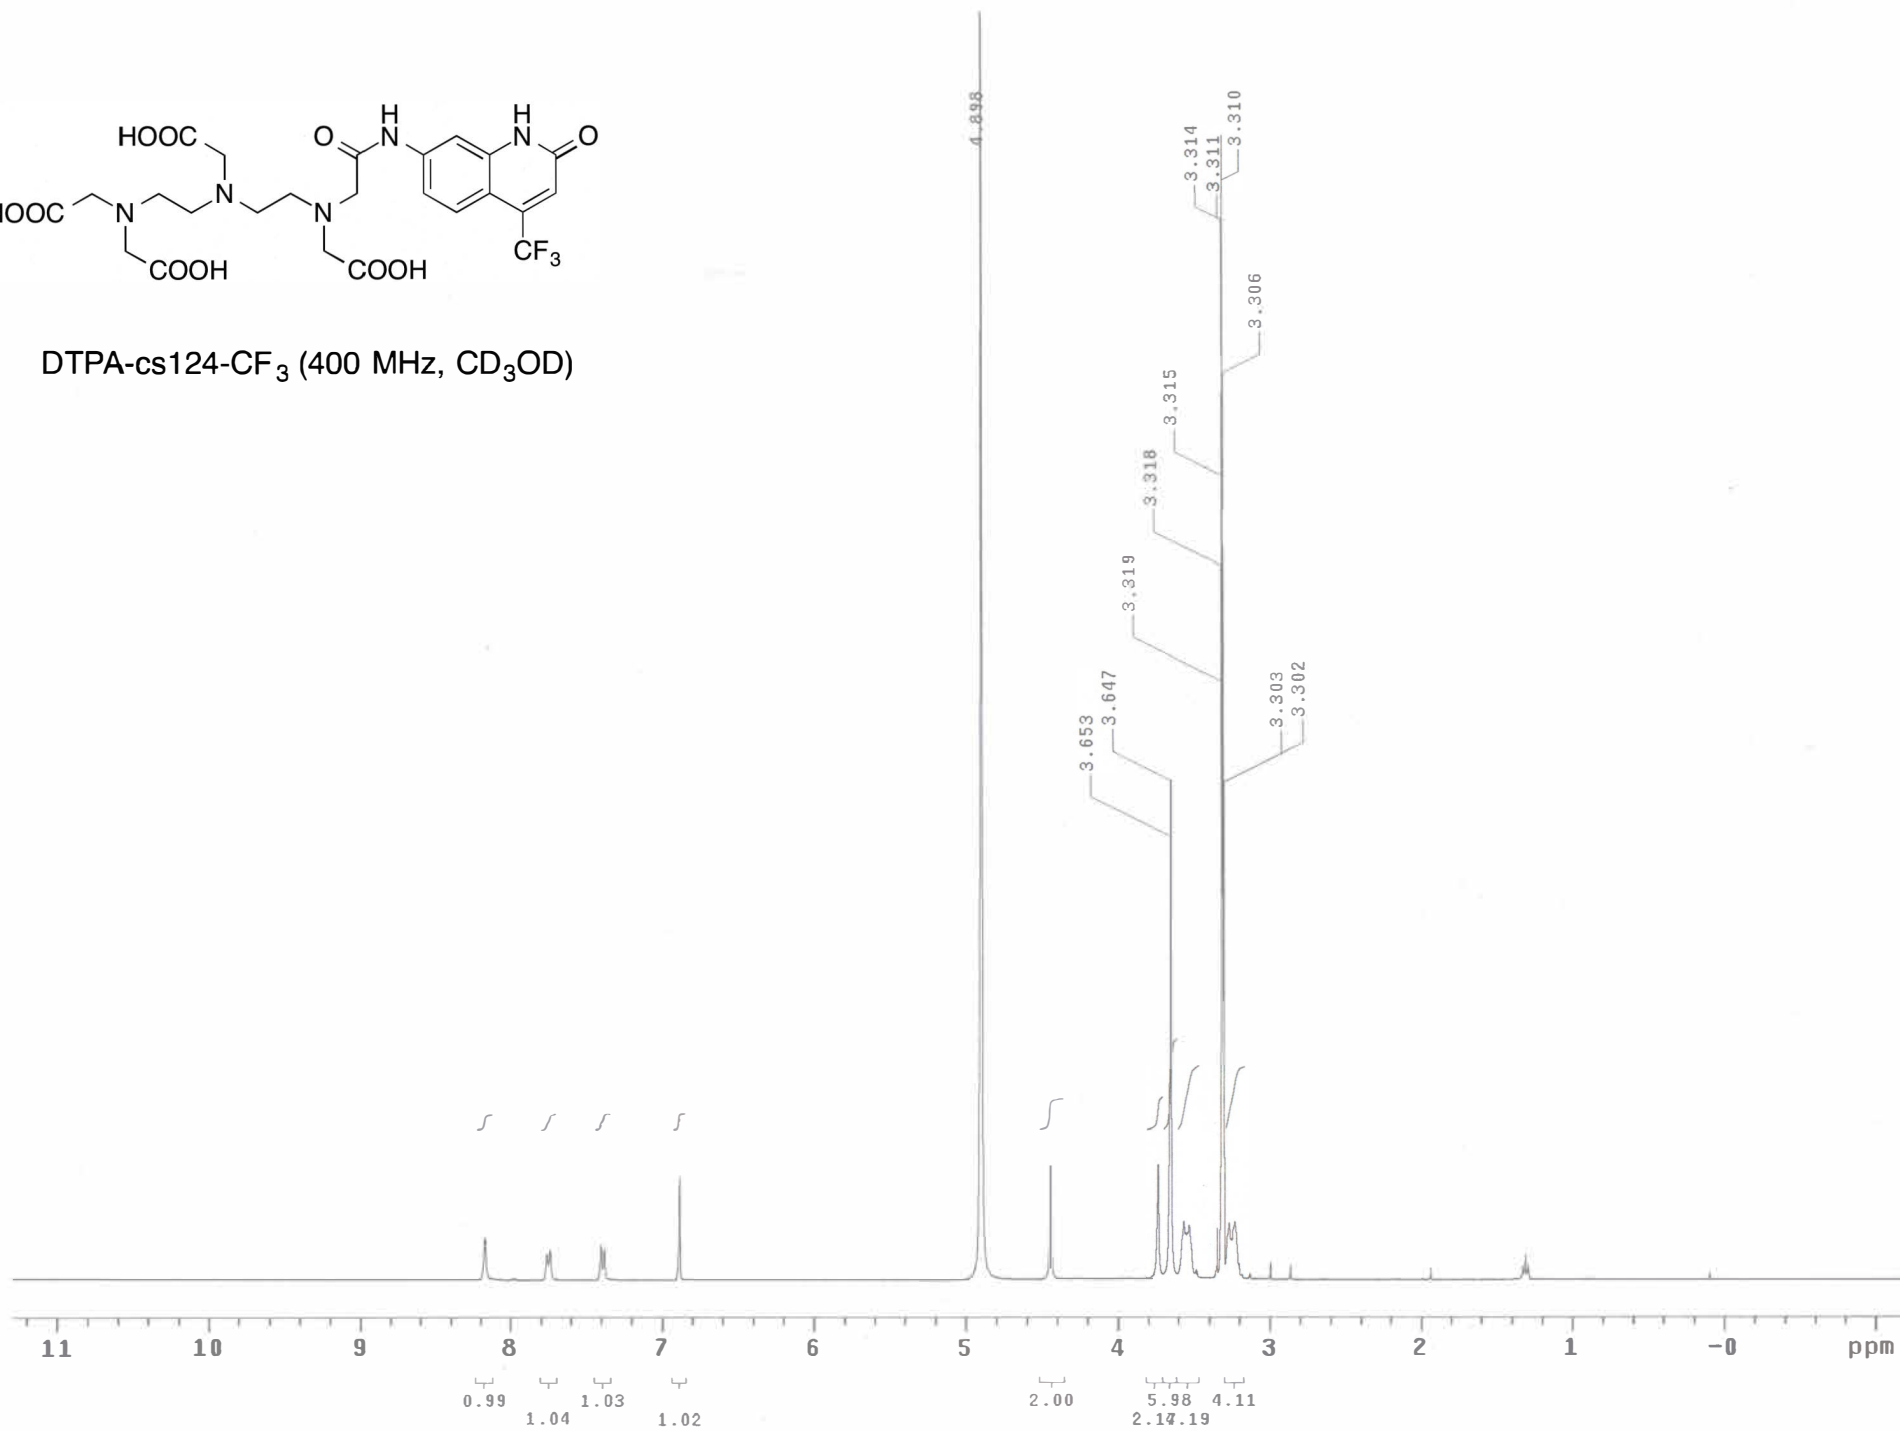

Supplementary Figure 15. <sup>1</sup>H NMR spectrum of DTPA-cs124-CF<sub>3</sub>. 21
